# Supplementary material for: Aqueous system-level processes and prokaryote assemblages in the ferruginous and sulfate-rich bottom waters of a post-mining lake
Source: Copernicus journal article supplement (doi:10.5194/bg-2021-253), 2021-11-15
Supplement: Supplementary file 1 [file bg-2021-253-supplement.zip]

Archive with 3 entries (2 files):
- Supplement_BG/
- Supplement_BG/Krona2.html
- Supplement_BG/Suplement_BG.pdf
