# Supplementary material for: Aqueous system-level processes and prokaryote assemblages in the ferruginous and sulfate-rich bottom waters of a post-mining lake
Source: Copernicus journal article supplement (doi:10.5194/bg-2021-253), 2021-11-15
Supplement: Supplementary file 1 [file bg-2021-253-supplement.zip › Supplement_BG/Krona2.html]

Javascript must be enabled to view this page.

magnitude

Hypolimnion
Monimolimnion

 101356.25
 91548

 99837.25
 71644.5

 589.75
 114.333333333333

 347.75
 114.333333333333

 315
 83

 315
 83

 315
 83

 0
 26.8333333333333

 0
 26.8333333333333

 0
 26.8333333333333

 0
 26.8333333333333

 242

 18764.75
 12544.25

 10966.75
 5767.75

 10966.75
 5767.75

 316
 132.583333333333

 316
 132.583333333333

 3981.5
 2177.83333333333

 3981.5
 2177.83333333333

 3981.5
 2120.5

 0
 57.3333333333333

 6564.25
 3401.58333333333

 6564.25
 3401.58333333333

 6564.25
 3401.58333333333

 7145.75
 6103.16666666667

 186
 132.833333333333

 186
 132.833333333333

 186
 132.833333333333

 186
 132.833333333333

 4831.25
 4578.33333333333

 4831.25
 4578.33333333333

 1926.75
 2737.91666666667

 878.25
 1071.16666666667

 1048.5
 1666.75

 2904.5
 1840.41666666667

 455
 634.333333333333

 184.25
 94.4166666666667

 631.5
 212.166666666667

 363.75
 214

 1270
 685.5

 1459.75
 995.333333333333

 1459.75
 995.333333333333

 40
 27.8333333333333

 40
 27.8333333333333

 40
 27.8333333333333

 40
 27.8333333333333

 89.25
 116.5

 89.25
 116.5

 80.75
 66.6666666666667

 80.75
 66.6666666666667

 8.5

 8.5

 7.25
 28.9166666666667

 7.25
 28.9166666666667

 7.25
 3.66666666666667

 7.25

 0
 25.25

 0
 25.25

 408.25
 75.1666666666667

 408.25
 75.1666666666667

 408.25
 75.1666666666667

 408.25
 75.1666666666667

 124
 25.25

 124
 25.25

 124
 25.25

 124
 25.25

 0
 57.5

 0
 42.75

 0
 42.75

 0
 42.75

 0
 14.75

 0
 14.75

 0
 14.75

 394.25
 233.666666666667

 394.25
 233.666666666667

 0
 43

 0
 43

 0
 14.6666666666667

 0
 14.6666666666667

 0
 14.6666666666667

 258
 439.666666666667

 258
 439.666666666667

 258
 439.666666666667

 258
 439.666666666667

 258
 426.166666666667

 0
 13.5

 35999.75
 16603.25

 225.25
 3183.5

 208.25
 2019.58333333333

 45.25
 1179.08333333333

 45.25
 1179.08333333333

 45.25
 1179.08333333333

 0
 69.1666666666667

 0
 69.1666666666667

 0
 43.5

 0
 25.6666666666667

 163
 701.416666666667

 163
 701.416666666667

 163
 701.416666666667

 17
 1163.91666666667

 10.5
 813.083333333333

 4
 155.25

 0
 58.5833333333333

 0
 41.1666666666667

 6.5
 278

 0
 137.916666666667

 0
 204.583333333333

 0
 93.6666666666667

 0
 110.916666666667

 0
 6.66666666666667

 0
 6.66666666666667

 0
 37.25

 0
 37.25

 0
 114.333333333333

 0
 114.333333333333

 0
 109.833333333333

 0
 13.8333333333333

 0
 13.8333333333333

 0
 7.83333333333333

 0
 7.83333333333333

 0
 35.8333333333333

 0
 35.8333333333333

 0
 52.3333333333333

 0
 52.3333333333333

 4527
 2012.91666666667

 4527
 2012.91666666667

 4527
 2012.91666666667

 4087
 1597.83333333333

 1886.5
 777.75

 0
 27.3333333333333

 144
 17

 0
 207.25

 0
 207.25

 264
 171.583333333333

 264
 171.583333333333

 41
 14.5

 65
 21.75

 65
 21.75

 70

 1273
 1585.66666666667

 1273
 1585.66666666667

 440.25
 188.25

 440.25
 188.25

 440.25
 188.25

 563.75
 1262.08333333333

 370
 1154.08333333333

 127.5
 37.1666666666667

 182.75
 512.75

 23.75
 591

 36
 13.1666666666667

 269
 117.083333333333

 269
 117.083333333333

 269
 101.083333333333

 0
 16

 10117.5
 3207.58333333333

 10117.5
 3207.58333333333

 3142
 812.916666666667

 399
 14.5833333333333

 399
 14.5833333333333

 2595.25
 756.833333333333

 799
 296.416666666667

 1162.5
 355.916666666667

 4926.5
 1522.16666666667

 2819
 905.833333333333

 517
 181.333333333333

 0
 304.5

 867
 364.75

 2107.5
 616.333333333333

 2107.5
 616.333333333333

 1748.75
 766.833333333333

 550.25
 262.166666666667

 17.75

 0
 262.166666666667

 1198.5
 504.666666666667

 209.5
 58.3333333333333

 437
 226

 277.75
 204.333333333333

 41

 17999.5
 4957.16666666667

 17999.5
 4957.16666666667

 541.25
 252.25

 541.25
 252.25

 541.25
 252.25

 17458.25
 4704.91666666667

 15510.25
 3926.66666666667

 15510.25
 3926.66666666667

 1948
 778.25

 1948
 778.25

 1389
 305.333333333333

 1389
 305.333333333333

 1389
 305.333333333333

 196.5
 52.8333333333333

 0
 29.3333333333333

 130
 55.0833333333333

 130
 55.0833333333333

 473.5
 139.416666666667

 314.75
 77.6666666666667

 158.75
 61.75

 256.25
 51.5

 256.25
 51.5

 332.75
 6.5

 332.75
 6.5

 275.25
 158.416666666667

 275.25
 158.416666666667

 275.25
 158.416666666667

 275.25
 158.416666666667

 275.25
 158.416666666667

 0
 158.416666666667

 2090.25
 5357.5

 808.25
 328.833333333333

 808.25
 328.833333333333

 808.25
 328.833333333333

 210.25
 60.3333333333333

 0
 60.3333333333333

 598
 209.25

 598
 209.25

 0
 59.25

 0
 59.25

 0
 164.666666666667

 231
 2994.5

 231
 2994.5

 231
 2994.5

 231
 2994.5

 231
 81.25

 0
 2913.25

 178
 30.5

 210
 47.75

 210
 47.75

 210
 47.75

 210
 47.75

 210
 47.75

 107
 47.75

 107
 47.75

 107
 47.75

 107
 47.75

 107
 47.75

 556
 531.25

 556
 296.25

 556
 296.25

 556
 296.25

 556
 296.25

 0
 217

 0
 217

 0
 217

 0
 217

 0
 1212.25

 0
 1212.25

 0
 1212.25

 0
 1212.25

 0
 1212.25

 3529.25
 2025.66666666667

 158.5
 43.3333333333333

 158.5
 43.3333333333333

 158.5
 43.3333333333333

 158.5
 43.3333333333333

 158.5
 43.3333333333333

 0
 3.83333333333333

 537.25
 782.25

 113.25
 46.5833333333333

 113.25
 45.4166666666667

 0
 3

 0
 3

 0
 7.25

 0
 7.25

 0
 7.25

 0
 1.16666666666667

 0
 1.16666666666667

 0
 1.16666666666667

 0
 1.16666666666667

 387
 680.916666666667

 154.75
 617.583333333333

 59.75
 118.333333333333

 59.75
 118.333333333333

 59.75
 118.333333333333

 0
 53

 0
 5.33333333333333

 0
 5.33333333333333

 0
 47.6666666666667

 0
 47.6666666666667

 79
 118.333333333333

 79
 118.333333333333

 0
 58.6666666666667

 0
 9.66666666666667

 63
 47.25

 16
 2.75

 0
 3.33333333333333

 0
 3.33333333333333

 0
 66.75

 0
 10.3333333333333

 0
 10.3333333333333

 0
 2.5

 0
 2.5

 0
 2.33333333333333

 0
 2.33333333333333

 0
 20.5833333333333

 0
 20.5833333333333

 0
 27.8333333333333

 0
 27.8333333333333

 0
 135.083333333333

 0
 2.66666666666667

 0
 2.66666666666667

 0
 76.5833333333333

 0
 76.5833333333333

 0
 53.3333333333333

 0
 53.3333333333333

 0
 2.5

 0
 2.5

 16
 9.25

 16
 9.25

 16
 9.25

 0
 83.1666666666667

 0
 83.1666666666667

 0
 83.1666666666667

 144.25
 49.5

 144.25
 44.5

 144.25
 44.5

 144.25
 44.5

 0
 5

 0
 5

 0
 5

 88
 13.8333333333333

 88
 13.8333333333333

 37
 49.25

 37
 49.25

 37
 49.25

 37
 17.25

 37
 17.25

 0
 22.25

 0
 9.75

 0
 5.5

 0
 5.5

 0
 5.5

 0
 5.5

 0
 5.5

 301.5
 877.75

 301.5
 877.75

 301.5
 877.75

 301.5
 877.75

 301.5
 877.75

 301.5
 236.166666666667

 0
 3.5

 0
 25.8333333333333

 0
 612.25

 457.75
 186.166666666667

 457.75
 186.166666666667

 457.75
 186.166666666667

 457.75
 186.166666666667

 457.75
 186.166666666667

 457.75
 186.166666666667

 336
 1249.83333333333

 336
 1249.83333333333

 336
 1249.83333333333

 336
 1249.83333333333

 336
 155.333333333333

 0
 59.6666666666667

 0
 95.6666666666667

 0
 315.666666666667

 0
 315.666666666667

 0
 778.833333333333

 0
 778.833333333333

 34557.25
 28690.75

 12781.25
 4318.83333333333

 181.75
 62.3333333333333

 181.75
 62.3333333333333

 80.75
 13

 80.75
 13

 101
 19.1666666666667

 91.75
 19.1666666666667

 0
 30.1666666666667

 62.5
 22.1666666666667

 62.5
 18.5

 62.5
 18.5

 62.5
 18.5

 0
 3.66666666666667

 0
 3.66666666666667

 0
 3.66666666666667

 21.25
 4.5

 21.25
 4.5

 21.25
 4.5

 0
 4.5

 380.75
 617.5

 3420.75
 941.333333333333

 61.75
 9.16666666666667

 45.5
 6.66666666666667

 4.5

 16.25
 2.5

 16.25
 2.5

 530.5
 84.8333333333333

 185.25
 25.3333333333333

 0
 25.3333333333333

 147.25
 42.8333333333333

 198
 16.6666666666667

 30.25
 5

 167.75
 11.6666666666667

 257.75
 77.5

 257.75
 77.5

 0
 77.5

 2034.5
 627.5

 2034.5
 627.5

 1211
 430.166666666667

 785
 197.333333333333

 990.75
 452.333333333333

 418.5
 138.916666666667

 159
 32.5833333333333

 159
 32.5833333333333

 259.5
 106.333333333333

 259.5
 106.333333333333

 572.25
 313.416666666667

 111.75
 81.6666666666667

 111.75
 81.6666666666667

 183.5
 73.8333333333333

 103
 56.8333333333333

 0
 51.75

 0
 51.75

 813.25
 216.416666666667

 213.75
 71.8333333333333

 91.75
 15.8333333333333

 91.75
 15.8333333333333

 122
 56

 122
 56

 588.5
 92.25

 5.5

 2

 2

 68.25
 33.4166666666667

 68.25
 33.4166666666667

 241.25
 10.1666666666667

 7.25

 98.5
 9.66666666666667

 98.5
 9.66666666666667

 6353.5
 1798.91666666667

 1574.75
 620.75

 1375
 620.75

 1375
 620.75

 4760
 1174.33333333333

 4351.5
 1110

 4351.5
 1110

 135.5
 15.5

 135.5
 15.5

 273
 48.8333333333333

 273
 48.8333333333333

 473.5
 167.833333333333

 473.5
 167.833333333333

 53.25
 53.3333333333333

 53.25

 68.75
 15

 31.25

 14937
 11629.25

 2916.75
 1507.58333333333

 416.25
 139.333333333333

 388.25
 139.333333333333

 246.25
 111

 136

 20.25

 7.75

 48.5
 8.66666666666667

 15.75

 15.75

 10.75

 10.75

 19.25
 5.33333333333333

 3.25
 2

 2.75
 1.66666666666667

 2.75
 1.66666666666667

 0
 1.66666666666667

 0
 1.66666666666667

 2378.25
 1343.08333333333

 22.25
 6.83333333333333

 246
 147.916666666667

 246
 147.916666666667

 231.25
 140.333333333333

 205

 248
 102.833333333333

 74.5
 19

 74.5
 19

 1556.25
 923

 113

 353.5
 371.833333333333

 464.75
 140.5

 625
 166.916666666667

 137
 35.6666666666667

 137
 35.6666666666667

 137
 35.6666666666667

 0
 35.6666666666667

 43

 11642.5
 9375.66666666666

 6459.5
 7228.91666666667

 1698.25
 1200.33333333333

 1698.25
 1200.33333333333

 2026
 3716.33333333333

 380
 1765.66666666667

 1466
 1522.83333333333

 180
 427.833333333333

 747.75
 1558.25

 620.5
 939.75

 127.25
 373.166666666667

 0
 245.333333333333

 1948
 754

 1948
 754

 1228
 590.25

 558.25
 447.5

 230
 271.333333333333

 328.25
 176.166666666667

 549.25
 65.75

 549.25
 65.75

 120.5
 77

 0
 77

 3380.75
 1313.25

 3244
 735.666666666667

 21.5

 2289.75
 455.583333333333

 469.75
 236.333333333333

 136.75
 577.583333333333

 67.5

 69.25
 151

 0
 144

 563
 238.25

 0
 127.666666666667

 0
 127.666666666667

 563
 110.583333333333

 563
 110.583333333333

 177
 691

 164.25
 202.166666666667

 164.25
 202.166666666667

 0
 158.666666666667

 12.75
 422.166666666667

 12.75
 233.666666666667

 12.75
 4.33333333333333

 0
 188.5

 0
 46.3333333333333

 0
 93.25

 0
 66.6666666666667

 0
 66.6666666666667

 0
 66.6666666666667

 4110.25
 11287.5

 988
 667.666666666667

 24
 338

 24
 47.6666666666667

 24
 47.6666666666667

 0
 23.8333333333333

 0
 23.8333333333333

 0
 40.8333333333333

 0
 40.8333333333333

 0
 46.4166666666667

 0
 46.4166666666667

 0
 3.16666666666667

 0
 3.16666666666667

 0
 95.3333333333333

 0
 2.33333333333333

 0
 93

 0
 80.75

 964
 329.666666666667

 362
 87.1666666666667

 362
 87.1666666666667

 0
 26.9166666666667

 0
 26.9166666666667

 602
 142.166666666667

 0
 31.6666666666667

 602
 80.8333333333333

 346.75
 178

 346.75
 178

 346.75
 178

 346.75
 178

 663.25
 1183.33333333333

 549.25
 595.833333333333

 549.25
 595.833333333333

 549.25
 595.833333333333

 114
 587.5

 0
 492.5

 0
 486.666666666667

 0
 5.83333333333333

 114
 95

 114
 95

 2030.75
 359.666666666667

 350.25
 92.3333333333333

 350.25
 92.3333333333333

 350.25
 92.3333333333333

 215.75
 71.8333333333333

 215.75
 71.8333333333333

 215.75
 71.8333333333333

 5

 5

 5

 20.75
 2.83333333333333

 20.75
 2.83333333333333

 20.75
 2.83333333333333

 871.25
 34.9166666666667

 871.25
 34.9166666666667

 871.25
 34.9166666666667

 326.5
 51.5

 326.5
 51.5

 326.5
 51.5

 57.25
 6296.25

 57.25
 6296.25

 57.25
 440

 57.25
 440

 0
 1594.33333333333

 0
 896.833333333333

 0
 697.5

 0
 869.333333333333

 0
 869.333333333333

 0
 3392.58333333333

 0
 707.25

 0
 1477.58333333333

 0
 737.333333333333

 0
 407.25

 0
 172.5

 0
 172.5

 0
 172.5

 0
 172.5

 0
 84.0833333333333

 0
 3.83333333333333

 0
 3.83333333333333

 0
 3.83333333333333

 0
 24.5

 0
 24.5

 0
 24.5

 0
 31.75

 0
 31.75

 0
 31.75

 0
 24

 0
 24

 1468
 1303.83333333333

 127.75
 22.75

 127.75
 22.75

 127.75
 22.75

 127.75
 22.75

 101
 37.1666666666667

 101
 32.3333333333333

 101
 32.3333333333333

 0
 32.3333333333333

 0
 4.83333333333333

 0
 4.83333333333333

 0
 4.83333333333333

 549.25
 270.083333333333

 148.25
 28.8333333333333

 148.25
 28.8333333333333

 148.25
 28.8333333333333

 401
 241.25

 401
 241.25

 67.25
 65.1666666666667

 77.25
 41.75

 183
 73.3333333333333

 31
 3.5

 42.5
 19.8333333333333

 155.25
 55.5

 155.25
 55.5

 155.25
 55.5

 155.25
 55.5

 109.5
 54.1666666666667

 109.5
 54.1666666666667

 109.5
 54.1666666666667

 109.5
 54.1666666666667

 27.25
 21.3333333333333

 27.25
 21.3333333333333

 19.75
 3.16666666666667

 0
 3.16666666666667

 25
 786.333333333333

 25
 786.333333333333

 25
 786.333333333333

 25
 786.333333333333

 295
 48.1666666666667

 295
 48.1666666666667

 0
 13.6666666666667

 0
 8

 0
 5.66666666666667

 295
 34.5

 295
 34.5

 78
 8.33333333333333

 78
 8.33333333333333

 78
 8.33333333333333

 950.25
 106.333333333333

 620.25
 46.75

 620.25
 46.75

 620.25
 46.75

 487.25
 20.9166666666667

 133
 25.8333333333333

 45.5

 45.5

 45.5

 37

 245.25
 56.9166666666667

 77.25
 21

 77.25
 21

 0
 21

 0
 106

 205
 64.1666666666667

 205
 64.1666666666667

 205
 64.1666666666667

 205
 64.1666666666667

 205
 64.1666666666667

 205
 64.1666666666667

 0
 2.5

 0
 2.5

 0
 2.5

 0
 2.5

 0
 2.5

 0
 25

 0
 25

 0
 25

 0
 25

 0
 25

 0
 25

 0
 83.1666666666667

 0
 83.1666666666667

 0
 83.1666666666667

 0
 83.1666666666667

 0
 83.1666666666667

 0
 83.1666666666667

 0
 145.5

 0
 145.5

 0
 145.5

 0
 145.5

 0
 145.5

 0
 145.5

 0
 1532.41666666667

 0
 1350.58333333333

 0
 1350.58333333333

 0
 1350.58333333333

 0
 1350.58333333333

 0
 420

 0
 136

 0
 794.583333333333

 2035
 1016

 505
 136

 505
 136

 505
 136

 505
 136

 505
 136

 459
 310.5

 368
 292

 368
 292

 368
 292

 368
 292

 724
 228.5

 724
 228.5

 488
 94.5

 488
 94.5

 488
 94.5

 236
 134

 144
 46.75

 144
 38.5

 0
 8.25

 92
 31

 92
 31

 0
 56.25

 0
 56.25

 0
 14.25

 0
 14.25

 0
 14.25

 0
 14.25

 0
 14.25

 0
 14.25

 0
 22

 0
 22

 0
 22

 0
 22

 0
 22

 0
 22

 1519
 19903.5

 681
 14692

 277
 8364.75

 277
 8364.75

 277
 8364.75

 78
 940.75

 0
 66.5

 0
 61.75

 0
 28.75

 0
 365.5

 199
 7059.25

 199

 0
 155

 0
 193.5

 0
 2876.5

 0
 2394.75

 0
 364.75

 0
 364.75

 102
 3639.25

 102
 3639.25

 102
 3441

 58
 3107.75

 58
 196

 0
 97.75

 0
 12.75

 44
 206.5

 44

 0
 58.25

 0
 58.25

 0
 90

 0
 198.25

 0
 198.25

 0
 101.75

 0
 11.5

 302
 201

 302
 201

 302
 201

 302
 201

 302
 201

 0
 619.25

 0
 619.25

 0
 355.5

 0
 305.25

 0
 305.25

 0
 50.25

 0
 50.25

 0
 263.75

 0
 50.75

 0
 50.75

 0
 165

 0
 165

 0
 25.25

 0
 25.25

 0
 33.25

 0
 33.25

 0
 33.25

 0
 33.25

 0
 33.25

 0
 1781.5

 0
 750.25

 0
 750.25

 0
 750.25

 0
 627

 0
 123.25

 0
 1031.25

 0
 82

 0
 82

 0
 82

 0
 215.5

 0
 215.5

 0
 215.5

 838
 5211.5

 0
 3357.75

 0
 3219.5

 0
 3219.5

 0
 3219.5

 0
 654

 0
 2565.5

 0
 138.25

 0
 138.25

 0
 138.25

 0
 138.25
